# Supplementary material for: The Functional Consequences of the Novel Ribosomal Pausing Site in SARS-CoV-2 Spike Glycoprotein RNA
Source: MDPI journal article supplement (doi:10.3390/ijms22126490), 2021-06-17
Supplement: s1 [file s1]

## Supplementary Figures and Tables

**Figure S1. Comparison of the incidence of the CCT-CGG-CGG-GCA stretch of codons and other sequences synonymously encoding -PRRA- in sense and antisense strands of protein-coding human sequences** (see Supplementary Table S2 for tabulation of sequence incidence).

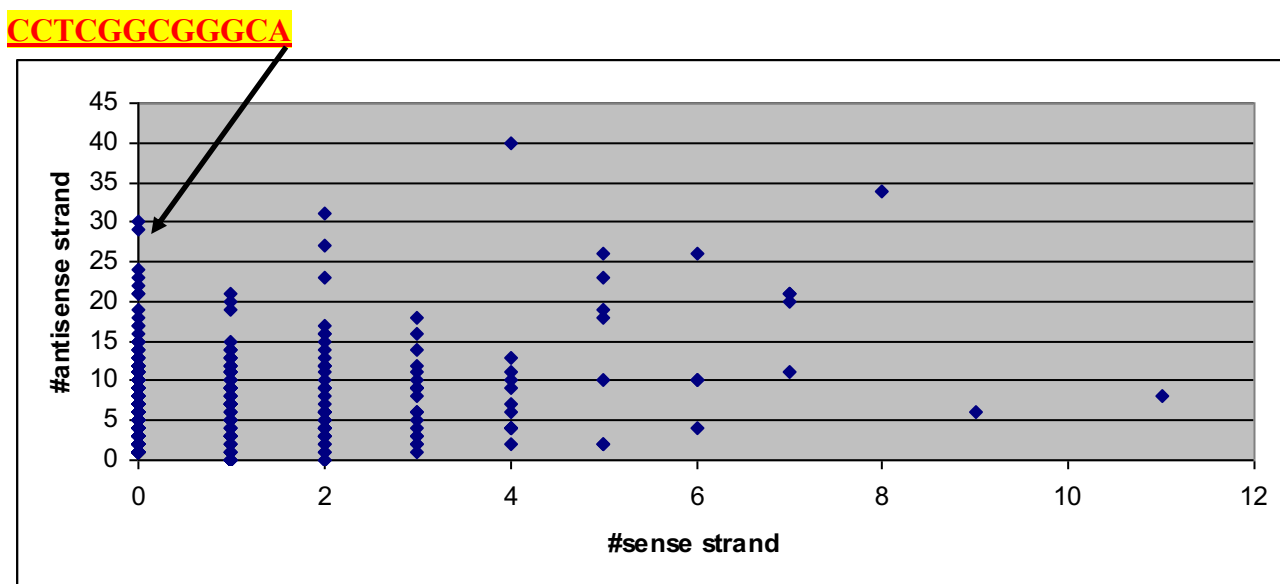

**Figure S2. Expression of original and codon-optimized S proteins in LV cell lysates (A) and in Expi293 cell lysates (B).** In (A), left panel was imaged at normal gain, while right panel was imaged at higher gain to visualize original S protein expression (S original). Experiments were repeated several times.

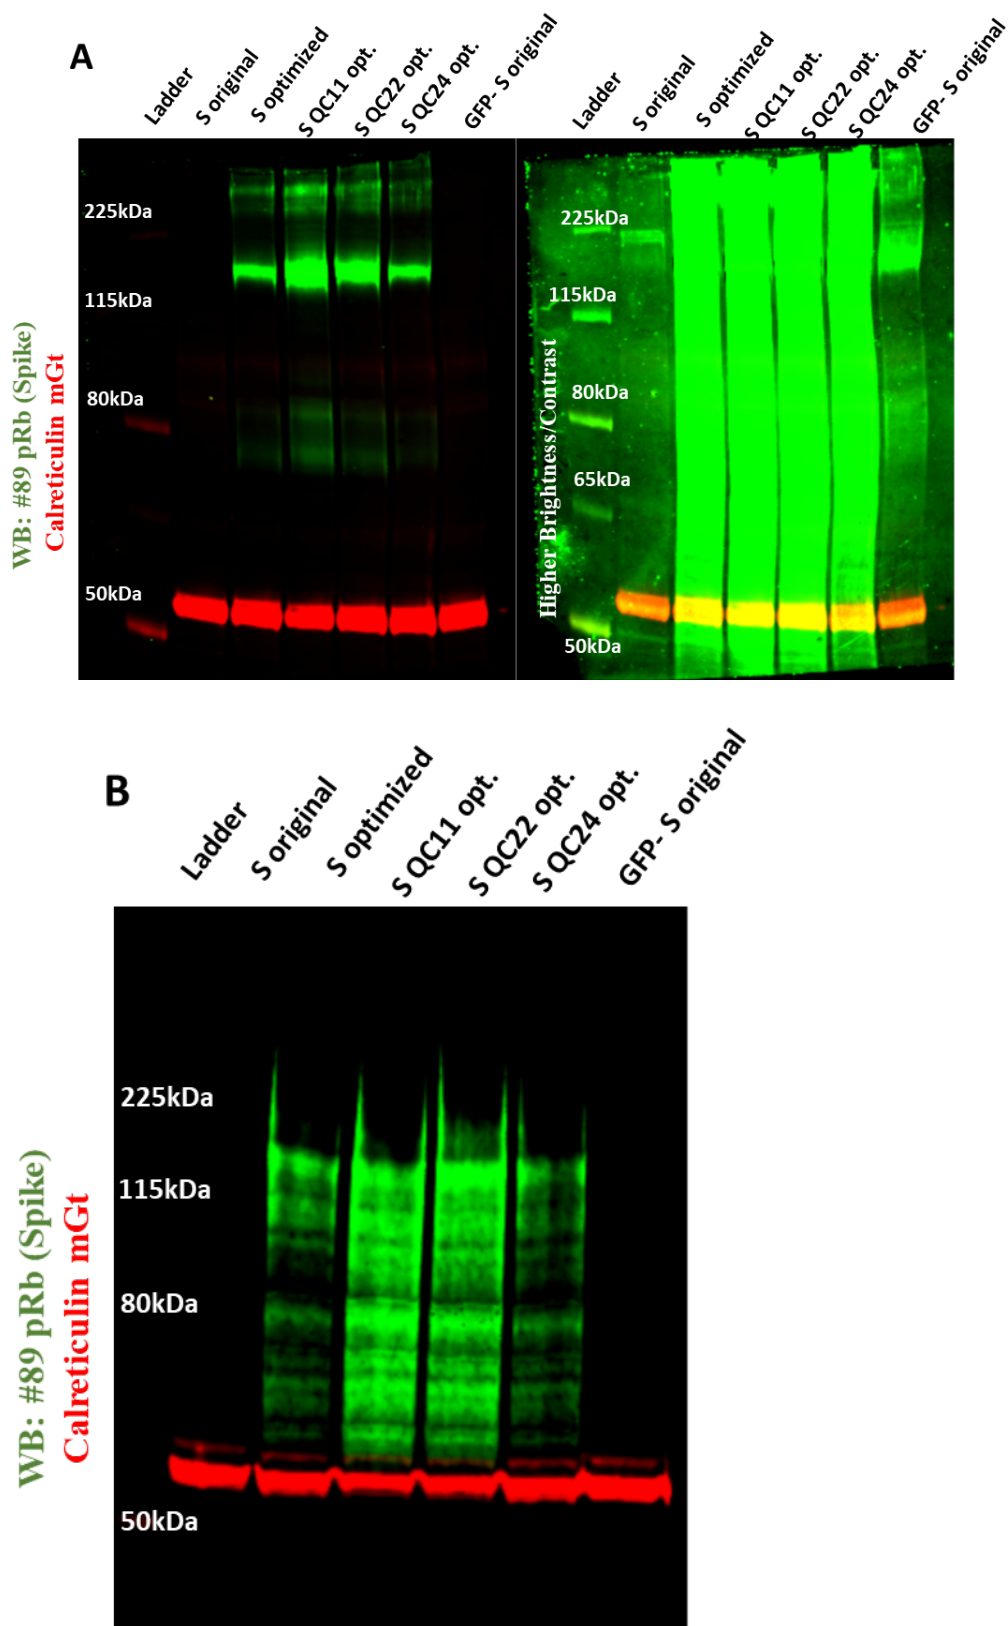

**Figure S3. Lentiviral pseudovirion titers for WPRE (upper) and LTR (lower) quantitated by qPCR.** Error bars indicate the standard deviation.

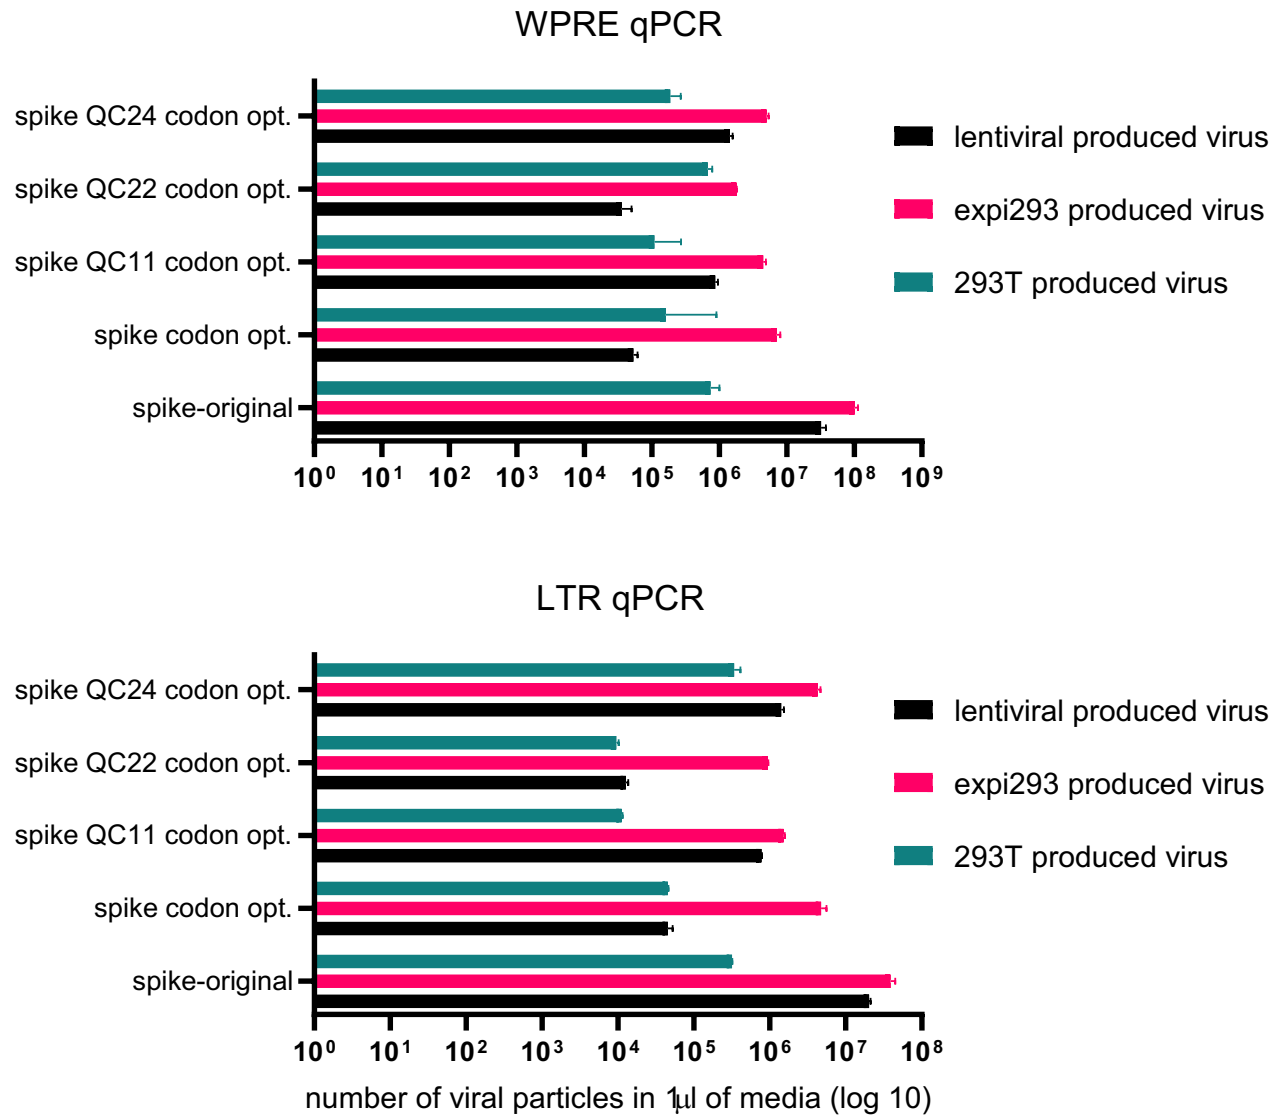

**Figure S4. ARPE-19 cell infection with Expi293 produced lentiviral pseudovirions.**  
Experiments were repeated several times. Scale bar=180  $\mu$ m.

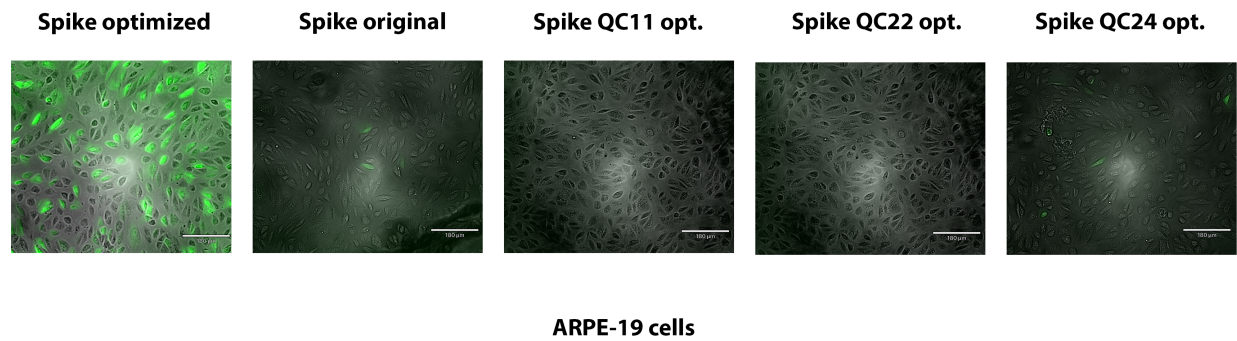

**Figure S5. Vero E6 infection with Expi293-produced pseudovirions.**  
Experiments were repeated several times. Scale bar=180  $\mu$ m.

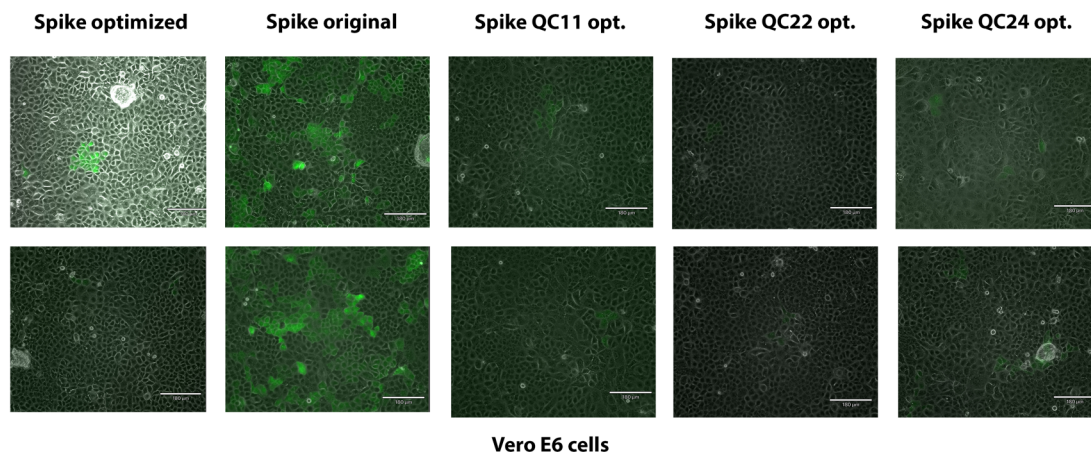

**Table S1. Codon usage in protein-coding genes of viral and human genomes.** Codons (CCT, CGG, and GCA) featuring in the -PRRA- insert are highlighted in yellow. CAT and CTT codons are highlighted in blue. CG-containing codons are highlighted in green. CDS = protein-coding sequences.

| Codon | SARS-CoV2 CDS | SARS CoV-2 CDS, % | Human CDS | Human CDS, % |
|-------|---------------|-------------------|-----------|--------------|
| AAA   | 2448          | 6.63              | 993621    | 2.45         |
| AAC   | 280           | 0.76              | 776603    | 1.92         |
| AAG   | 1097          | 2.97              | 1295568   | 3.20         |
| AAT   | 2873          | 7.78              | 689701    | 1.70         |
| ACA   | 1458          | 3.95              | 614523    | 1.52         |
| ACC   | 54            | 0.15              | 768147    | 1.90         |
| ACG   | 63            | 0.17              | 246105    | 0.61         |
| ACT   | 632           | 1.71              | 533609    | 1.32         |
| AGA   | 602           | 1.63              | 494682    | 1.22         |
| AGC   | 47            | 0.13              | 791383    | 1.95         |
| AGG   | 47            | 0.13              | 486463    | 1.20         |
| AGT   | 478           | 1.3               | 493429    | 1.22         |
| ATA   | 1106          | 3.                | 304565    | 0.75         |
| ATC   | 191           | 0.52              | 846466    | 2.09         |
| ATG   | 762           | 2.06              | 896005    | 2.21         |
| ATT   | 1955          | 5.3               | 650473    | 1.61         |
| CAA   | 625           | 1.69              | 501911    | 1.24         |
| CAC   | 29            | 0.08              | 613713    | 1.51         |
| CAG   | 298           | 0.81              | 1391973   | 3.43         |
| CAT   | 576           | 1.56              | 441711    | 1.09         |
| CCA   | 476           | 1.29              | 688038    | 1.70         |
| CCC   | 11            | 0.03              | 804620    | 1.99         |
| CCG   | 48            | 0.13              | 281570    | 0.69         |
| CCT   | 446           | 1.21              | 713233    | 1.76         |
| CGA   | 120           | 0.33              | 250760    | 0.62         |
| CGC   | 29            | 0.08              | 423516    | 1.05         |
| CGG   | 9             | 0.02              | 464485    | 1.15         |
| CGT   | 316           | 0.86              | 184609    | 0.46         |
| CTA   | 75            | 0.2               | 290751    | 0.72         |
| CTC   | 49            | 0.13              | 796638    | 1.97         |
| CTG   | 29            | 0.08              | 1611801   | 3.98         |
| CTT   | 780           | 2.11              | 536515    | 1.32         |
| GAA   | 2049          | 5.55              | 1177632   | 2.91         |
| GAC   | 233           | 0.63              | 1020595   | 2.52         |
| GAG   | 380           | 1.03              | 1609975   | 3.97         |
| GAT   | 2750          | 7.45              | 885429    | 2.18         |
| GCA   | 1026          | 2.78              | 643471    | 1.59         |
| GCC   | 28            | 0.08              | 1127679   | 2.78         |
| GCG   | 76            | 0.21              | 299495    | 0.74         |
| GCT   | 452           | 1.22              | 750096    | 1.85         |
| GGA   | 537           | 1.46              | 669873    | 1.65         |
| GGC   | 68            | 0.18              | 903565    | 2.23         |
| GGG   | 31            | 0.08              | 669768    | 1.65         |
| GGT   | 986           | 2.67              | 437126    | 1.08         |
| GTA   | 844           | 2.29              | 287712    | 0.71         |
| GTC   | 53            | 0.14              | 588138    | 1.45         |
| GTG   | 79            | 0.21              | 1143534   | 2.82         |
| GTT   | 923           | 2.5               | 448607    | 1.11         |
| TAC   | 134           | 0.36              | 622407    | 1.54         |
| TAT   | 1998          | 5.41              | 495699    | 1.22         |
| TCA   | 1010          | 2.74              | 496448    | 1.22         |
| TCC   | 51            | 0.14              | 718892    | 1.77         |
| TCG   | 37            | 0.1               | 179419    | 0.44         |
| TCT   | 853           | 2.31              | 618711    | 1.53         |
| TGC   | 69            | 0.19              | 513028    | 1.27         |
| TGG   | 342           | 0.93              | 535595    | 1.32         |
| TGT   | 485           | 1.31              | 430311    | 1.06         |
| TTA   | 1468          | 3.98              | 311881    | 0.77         |
| TTC   | 332           | 0.9               | 824692    | 2.03         |
| TTG   | 374           | 1.01              | 525688    | 1.30         |
| TTT   | 1229          | 3.33              | 714298    | 1.76         |

**Table S2. Statistics of the CCT-CGG-CGG-GCA stretch of codons and other sequences encoding -PRRA- in sense and antisense strands of human protein-coding sequences.** All three reading frames of the antisense strand were analyzed. Human protein-coding sequences were obtained from the CCDS database (release 22, <ftp.ncbi.nlm.nih.gov/pub/CCDS/>). The SARS-CoV-2 S protein RNA -CCTCGGCGGGCA- insert is indicated in red.

| Stretch of codons   | Sense    | Antisense |
|---------------------|----------|-----------|
| CCCAGGAGGGCC        | 4        | 40        |
| CCCCGCCGGGCC        | 8        | 34        |
| CCCCGCAGGGCC        | 2        | 31        |
| CCCCGCAGGGCT        | 0        | 30        |
| <b>CCTCGGCGGGCA</b> | <b>0</b> | <b>29</b> |
| CCCAGGAGGGCA        | 2        | 27        |
| CCCAGAAGAGCA        | 5        | 26        |
| CCCCGCCGCGCC        | 6        | 26        |
| CCTCGAAGAGCT        | 0        | 24        |
| CCACGAAGAGCT        | 0        | 23        |
| CCCCGGAGAGCC        | 2        | 23        |
| CCCCGGCGGGCA        | 5        | 23        |
| CCCAGAAGAGCT        | 0        | 22        |
| CCTCGGAGAGCA        | 0        | 21        |
| CCCCGCAGGGCA        | 0        | 21        |
| CCCAGAAGGGCT        | 1        | 21        |
| CCGCGCCGCGCG        | 7        | 21        |
| CCGCGCCGGGCC        | 7        | 21        |
| CCCAGGAGAGCA        | 1        | 20        |
| CCGCGCCGCGCC        | 7        | 20        |
| CCCAGAAGGGCA        | 0        | 19        |
| CCACGCCGTGCT        | 1        | 19        |
| CCAAGAAGAGCC        | 5        | 19        |
| CCTCGAAGAGCA        | 0        | 18        |
| CCCAGAAGAGCC        | 3        | 18        |
| CCTCGGAGGGCA        | 5        | 18        |
| CCACGTAGGGCT        | 0        | 17        |
| CCTCGTAGAGCT        | 0        | 17        |
| CCCAGGAGGGCG        | 2        | 17        |
| CCACGGCGGGCA        | 0        | 16        |
| CCCCGCCGGGCA        | 2        | 16        |
| CCCAGGAGAGCC        | 2        | 16        |
| CCCAGACGGGCC        | 3        | 16        |
| CCGAGGAGGGCT        | 0        | 15        |
| CCACGAAGAGCA        | 0        | 15        |
| CCTCGAAGGGCC        | 0        | 15        |
| CCTCGCAGAGCC        | 0        | 15        |
| CCTCGGCGGGCG        | 1        | 15        |
| CCCAGGAGGGCT        | 2        | 15        |
| CCTCGGCGCGCA        | 0        | 14        |
| CCACGAAGAGCC        | 0        | 14        |
| CCTCGCAGGGCT        | 0        | 14        |
| CCACGGCGGGCT        | 0        | 14        |
| CCACGCCGGGCG        | 1        | 14        |
| CCCCGCCGGGCT        | 1        | 14        |

|              |   |    |
|--------------|---|----|
| CCTCGGAGGGCC | 1 | 14 |
| CCGCGGCGCGCT | 2 | 14 |
| CCCAGGCGGGCC | 3 | 14 |
| CCTCGTAGGGCG | 0 | 13 |
| CCGAGAAGAGCA | 0 | 13 |
| CCTCGGCGTGCT | 0 | 13 |
| CCACGGAGGGCG | 0 | 13 |
| CCACGCCGGGCA | 0 | 13 |
| CCGCGCCGGGCG | 1 | 13 |
| CCACGAAGGGCA | 1 | 13 |
| CCTCGGAGAGCT | 1 | 13 |
| CCACGCAGGGCC | 1 | 13 |
| CCGCGGCGCGCA | 2 | 13 |
| CCCAGGCGGGCA | 4 | 13 |
| CCGCGGCGTGCA | 0 | 12 |
| CCGAGGCGGGCG | 0 | 12 |
| CCTCGTAGAGCG | 0 | 12 |
| CCTCGAAGAGCG | 0 | 12 |
| CCACGTCGGGCA | 0 | 12 |
| CCTCGGCGCGCG | 0 | 12 |
| CCTCGGCGCGCT | 0 | 12 |
| CCCCGCAGAGCA | 0 | 12 |
| CCACGGAGGGCT | 0 | 12 |
| CCCCGGCGGGCT | 0 | 12 |
| CCGAGGAGGGCA | 1 | 12 |
| CCAAGAAGGGCA | 1 | 12 |
| CCTCGGAGGGCT | 1 | 12 |
| CCAAGAAGAGCT | 1 | 12 |
| CCGCGGAGGGCC | 2 | 12 |
| CCGAGGAGGGCC | 2 | 12 |
| CCTCGCCGGGCA | 2 | 12 |
| CCGAGGAGAGCA | 3 | 12 |
| CCACGTAGAGCA | 0 | 11 |
| CCGAGGCGGGCA | 0 | 11 |
| CCTCGTCGCGCT | 0 | 11 |
| CCTCGGAGGGCG | 0 | 11 |
| CCTCGAAGGGCT | 0 | 11 |
| CCACGGCGCGCA | 0 | 11 |
| CCACGAAGGGCC | 0 | 11 |
| CCTCGCAGAGCT | 0 | 11 |
| CCCAGGAGAGCT | 0 | 11 |
| CCGAGGCGAGCC | 1 | 11 |
| CCCCGAAGAGCT | 1 | 11 |
| CCCCGGCGCGCA | 1 | 11 |
| CCCCGGAGGGCA | 1 | 11 |
| CCCCGGCGCGCC | 1 | 11 |
| CCACGCAGGGCA | 2 | 11 |
| CCGAGGCGGGCT | 3 | 11 |
| CCCCGGAGAGCA | 4 | 11 |
| CCACGCAGAGCG | 7 | 11 |
| CCACGTCGTGCA | 0 | 10 |
| CCGCGTCGCGCT | 0 | 10 |
| CCGCGCCGAGCA | 0 | 10 |

|              |   |    |
|--------------|---|----|
| CCACGAAGAGCG | 0 | 10 |
| CCGCGTCGGGCC | 0 | 10 |
| CCGCGCCGCGCA | 0 | 10 |
| CCACGGCGTGCA | 0 | 10 |
| CCTCGTAGAGCA | 0 | 10 |
| CCACGTCGGGCT | 0 | 10 |
| CCACGTAGAGCT | 0 | 10 |
| CCGAGGAGAGCT | 0 | 10 |
| CCCCGACGGGCA | 0 | 10 |
| CCTCGGCGAGCT | 0 | 10 |
| CCCCGACGCGCT | 0 | 10 |
| CCGCGCAGAGCC | 0 | 10 |
| CCGCGGCGGGCC | 0 | 10 |
| CCCCGACGGGCT | 0 | 10 |
| CCACGGAGAGCT | 0 | 10 |
| CCCCGGCGGGCC | 0 | 10 |
| CCACGGAGAGCA | 1 | 10 |
| CCACGCAGGGCT | 1 | 10 |
| CCACGCCGGGCC | 1 | 10 |
| CCCAGGCGGGCG | 2 | 10 |
| CCAAGAAGAGCA | 3 | 10 |
| CCCCGGAGGGCC | 4 | 10 |
| CCGCGGCGGGCG | 5 | 10 |
| CCGCGGCGCGCG | 6 | 10 |
| CCCCGCCGGGCG | 6 | 10 |
| CCGCGCCGTGCA | 0 | 9  |
| CCACGCCGTGCG | 0 | 9  |
| CCTCGTCGGGCA | 0 | 9  |
| CCTCGCAGGGCG | 0 | 9  |
| CCTCGTAGGGCT | 0 | 9  |
| CCCCGAAGGGCA | 0 | 9  |
| CCACGTAGGGCC | 0 | 9  |
| CCACGCCGCGCA | 0 | 9  |
| CCACGCCGGGCT | 0 | 9  |
| CCAAGACGGGCA | 0 | 9  |
| CCCAGACGGGCA | 0 | 9  |
| CCTCGCCGGGCC | 0 | 9  |
| CCACGCAGAGCC | 0 | 9  |
| CCCCGCAGAGCC | 0 | 9  |
| CCGCGCCGGGCA | 1 | 9  |
| CCGCGCCGCGCT | 1 | 9  |
| CCGCGCCGGGCT | 1 | 9  |
| CCGCGGCGCGCC | 1 | 9  |
| CCAAGGCGGGCA | 1 | 9  |
| CCTCGGCGGGCT | 1 | 9  |
| CCACGGCGGGCC | 1 | 9  |
| CCGCGGCGGGCA | 2 | 9  |
| CCTCGCCGGGCG | 2 | 9  |
| CCGCGCAGGGCC | 2 | 9  |
| CCGCGCCGAGCC | 3 | 9  |
| CCCCGCCGAGCC | 3 | 9  |
| CCAAGGAGGGCA | 3 | 9  |
| CCCCGCAGAGCT | 3 | 9  |



|              |    |   |
|--------------|----|---|
| CCGCGCAGGGCG | 4  | 9 |
| CCGAGGCGCGCG | 0  | 8 |
| CCTCGTCGGGCG | 0  | 8 |
| CCACGTAGGGCA | 0  | 8 |
| CCCCGCCGTGCT | 0  | 8 |
| CCACGACGCGCT | 0  | 8 |
| CCCCGAAGAGCA | 0  | 8 |
| CCTCGCCGCGCA | 0  | 8 |
| CCCCGCCGCGCT | 0  | 8 |
| CCAAGGAGAGCT | 0  | 8 |
| CCCAGGCGCGCC | 0  | 8 |
| CCCAGAAGGGCC | 0  | 8 |
| CCGAGAAGAGCT | 1  | 8 |
| CCCCGGCGGGCG | 1  | 8 |
| CCGAGGCGGGCC | 1  | 8 |
| CCAAGGAGAGCC | 1  | 8 |
| CCCCGACGGGCC | 2  | 8 |
| CCCCGCCGCGCG | 3  | 8 |
| CCACGGAGAGCC | 11 | 8 |
| CCTCGCCGTGCG | 0  | 7 |
| CCGAGAAGGGCG | 0  | 7 |
| CCGCGGCGAGCA | 0  | 7 |
| CCACGACGAGCA | 0  | 7 |
| CCTCGTCGCGCA | 0  | 7 |
| CCACGGCGTGCT | 0  | 7 |
| CCTCGCAGAGCG | 0  | 7 |
| CCACGACGCGCA | 0  | 7 |
| CCGAGAAGGGCT | 0  | 7 |
| CCCCGCAGAGCG | 0  | 7 |
| CCCCGTAGAGCT | 0  | 7 |
| CCCCGCCGAGCT | 0  | 7 |
| CCCCGAAGGGCT | 0  | 7 |
| CCCAGGCGTGCC | 0  | 7 |
| CCACGCCGCGCT | 0  | 7 |
| CCTCGCCGCGCT | 0  | 7 |
| CCTCGAAGAGCC | 0  | 7 |
| CCAAGACGGGCC | 0  | 7 |
| CCTAGGAGAGCC | 0  | 7 |
| CCGCGGAGGGCG | 1  | 7 |
| CCTCGCCGCGCG | 1  | 7 |
| CCTCGTCGGGCT | 1  | 7 |
| CCCCGCAGGGCG | 1  | 7 |
| CCGAGAAGGGCC | 1  | 7 |
| CCTCGCAGGGCC | 1  | 7 |
| CCACGGAGGGCC | 1  | 7 |
| CCTCGGAGAGCC | 2  | 7 |
| CCAAGGAGGGCC | 4  | 7 |
| CCGCGTAGGGCA | 0  | 6 |
| CCACGTCGGGCG | 0  | 6 |
| CCACGGCGTGCG | 0  | 6 |
| CCACGTAGAGCG | 0  | 6 |
| CCGAGGAGGGCG | 0  | 6 |
| CCCCGTCGTGCT | 0  | 6 |

|              |   |   |
|--------------|---|---|
| CCGAGAAGAGCG | 0 | 6 |
| CCACGACGCGCG | 0 | 6 |
| CCGCGAAGGGCT | 0 | 6 |
| CCGCGAAGAGCT | 0 | 6 |
| CCACGACGAGCT | 0 | 6 |
| CCCCGTCGAGCC | 0 | 6 |
| CCGAGACGGGCT | 0 | 6 |
| CCGCGGAGAGCT | 0 | 6 |
| CCTCGTCGCGCC | 0 | 6 |
| CCAAGGCGAGCT | 0 | 6 |
| CCAAGGCGTGCC | 0 | 6 |
| CCTCGTAGGGCC | 0 | 6 |
| CCGAGGAGAGCC | 0 | 6 |
| CCAAGGCGCGCA | 0 | 6 |
| CCTCGCAGAGCA | 0 | 6 |
| CCACGGAGGGCA | 0 | 6 |
| CCTAGGAGGGCA | 0 | 6 |
| CCCCGGCGCGCG | 1 | 6 |
| CCTCGTCGGGCC | 1 | 6 |
| CCCAGACGGGCT | 1 | 6 |
| CCACGTCGAGCT | 2 | 6 |
| CCACGCCGTGCC | 2 | 6 |
| CCCCGGCGAGCT | 2 | 6 |
| CCCCGAAGGGCC | 2 | 6 |
| CCCCGGAGAGCT | 2 | 6 |
| CCGCGCAGGGCT | 3 | 6 |
| CCCAGGCGAGCA | 3 | 6 |
| CCAAGGAGAGCA | 4 | 6 |
| CCAAGAAGGGCT | 9 | 6 |
| CCGCGTCGCGCG | 0 | 5 |
| CCGCGTCGCGCA | 0 | 5 |
| CCGCGCAGAGCG | 0 | 5 |
| CCCAGGCGTGCG | 0 | 5 |
| CCACGGCGAGCG | 0 | 5 |
| CCTCGACGTGCT | 0 | 5 |
| CCTCGAAGGGCG | 0 | 5 |
| CCCCGACGGGCG | 0 | 5 |
| CCCCGAAGGGCG | 0 | 5 |
| CCGCGAAGGGCC | 0 | 5 |
| CCGAGAAGGGCA | 0 | 5 |
| CCCCGGCGTGCA | 0 | 5 |
| CCAAGACGTGCT | 0 | 5 |
| CCCCGTAGGGCT | 0 | 5 |
| CCCCGGAGAGCG | 0 | 5 |
| CCACGAAGGGCT | 0 | 5 |
| CCACGTCGGGCC | 0 | 5 |
| CCACGTAGAGCC | 0 | 5 |
| CCCAGGCGAGCT | 0 | 5 |
| CCCAGGCGCGCA | 0 | 5 |
| CCAAGGCGGGCT | 0 | 5 |
| CCCCGGCGCGCT | 0 | 5 |
| CCTCGGCGCGCC | 0 | 5 |
| CCAAGGCGGGCC | 0 | 5 |

|              |   |   |
|--------------|---|---|
| CCAAGGCGGGCG | 1 | 5 |
| CCAAGAAGAGCG | 1 | 5 |
| CCCCGGAGGGCT | 1 | 5 |
| CCAAGAAGGGCC | 1 | 5 |
| CCCAGGCGTGCT | 2 | 5 |
| CCTAGGAGAGCA | 2 | 5 |
| CCACGCCGCGCC | 2 | 5 |
| CCCCGGAGGGCG | 3 | 5 |
| CCGCGCCGTGCG | 0 | 4 |
| CCGCGTCGGGCG | 0 | 4 |
| CCGCGGCGTGCG | 0 | 4 |
| CCGAGACGTGCA | 0 | 4 |
| CCACGTCGTGCT | 0 | 4 |
| CCTCGTCGTGCT | 0 | 4 |
| CCACGTAGGGCG | 0 | 4 |
| CCGCGAAGGGCA | 0 | 4 |
| CCTCGACGGGCG | 0 | 4 |
| CCACGAAGGGCG | 0 | 4 |
| CCCCGAAGAGCG | 0 | 4 |
| CCTCGCCGTGCA | 0 | 4 |
| CCGCGGCGAGCC | 0 | 4 |
| CCGCGACGGGCC | 0 | 4 |
| CCCCGACGAGCT | 0 | 4 |
| CCCCGCCGTGCA | 0 | 4 |
| CCCCGTCGCGCA | 0 | 4 |
| CCGCGGAGAGCA | 0 | 4 |
| CCCAGACGTGCA | 0 | 4 |
| CCTCGGAGAGCG | 0 | 4 |
| CCCCGTCGGGCT | 0 | 4 |
| CCTCGAAGGGCA | 0 | 4 |
| CCCCGCCGTGCC | 0 | 4 |
| CCGCGGAGAGCC | 0 | 4 |
| CCGAGAAGAGCC | 0 | 4 |
| CCTCGCAGGGCA | 0 | 4 |
| CCTAGAAGGGCA | 0 | 4 |
| CCCAGGCGCGCT | 0 | 4 |
| CCCAGGCGGGCT | 0 | 4 |
| CCCCGCCGAGCA | 1 | 4 |
| CCCAGAAGAGCG | 1 | 4 |
| CCACGTCGCGCC | 1 | 4 |
| CCCCGGCGTGCC | 2 | 4 |
| CCCAGACGCGCA | 2 | 4 |
| CCCCGAAGAGCC | 2 | 4 |
| CCTAGGAGAGCT | 2 | 4 |
| CCTCGGCGGGCC | 2 | 4 |
| CCCCGCCGCGCA | 3 | 4 |
| CCGCGCCGTGCC | 4 | 4 |
| CCTCGTCGAGCT | 4 | 4 |
| CCTCGCCGAGCT | 4 | 4 |
| CCTCGCCGGGCT | 6 | 4 |
| CCGCGAAGAGCG | 0 | 3 |
| CCTCGTCGTGCA | 0 | 3 |
| CCCCGACGAGCG | 0 | 3 |

|              |   |   |
|--------------|---|---|
| CCGCGGCGTGCT | 0 | 3 |
| CCGCGTCGGGCT | 0 | 3 |
| CCGCGTAGGGCT | 0 | 3 |
| CCGCGCCGAGCT | 0 | 3 |
| CCTCGTCGTGCC | 0 | 3 |
| CCGCGTAGGGCC | 0 | 3 |
| CCGCGACGCGCC | 0 | 3 |
| CCACGTCGCGCA | 0 | 3 |
| CCTCGACGTGCC | 0 | 3 |
| CCGCGCAGAGCA | 0 | 3 |
| CCTCGGCGTGCA | 0 | 3 |
| CCACGTCGCGCT | 0 | 3 |
| CCACGCAGGGCG | 0 | 3 |
| CCGAGACGCGCT | 0 | 3 |
| CCCCGTCGCGCT | 0 | 3 |
| CCCCGTAGAGCA | 0 | 3 |
| CCACGCCGAGCA | 0 | 3 |
| CCAAGGAGGGCG | 0 | 3 |
| CCCAGGCGCGCG | 0 | 3 |
| CCCAGACGCGCG | 0 | 3 |
| CCTCGCCGTGCC | 0 | 3 |
| CCAAGACGAGCT | 0 | 3 |
| CCTCGCCGAGCC | 0 | 3 |
| CCACGCAGAGCA | 0 | 3 |
| CCTAGGCGCGCA | 0 | 3 |
| CCACGGCGCGCT | 0 | 3 |
| CCCAGACGCGCC | 0 | 3 |
| CCTCGCCGAGCG | 1 | 3 |
| CCCCGGCGAGCG | 1 | 3 |
| CCACGGCGGGCG | 1 | 3 |
| CCACGGCGTGCC | 1 | 3 |
| CCTCGGCGTGCC | 1 | 3 |
| CCCCGTCGGGCC | 1 | 3 |
| CCTAGGCGGGCC | 1 | 3 |
| CCGCGACGCGCT | 2 | 3 |
| CCCAGGAGAGCG | 2 | 3 |
| CCCCGGCGAGCA | 2 | 3 |
| CCGAGGCGCGCC | 2 | 3 |
| CCTCGTCGAGCG | 3 | 3 |
| CCCCGGCGTGCT | 3 | 3 |
| CCGCGTCGTGCG | 0 | 2 |
| CCGCGTCGTGCA | 0 | 2 |
| CCACGTCGTGCG | 0 | 2 |
| CCGAGGCGTGCG | 0 | 2 |
| CCGCGACGTGCA | 0 | 2 |
| CCGCGACGCGCG | 0 | 2 |
| CCTCGACGTGCG | 0 | 2 |
| CCGAGACGAGCG | 0 | 2 |
| CCGCGTCGTGCC | 0 | 2 |
| CCGCGACGAGCA | 0 | 2 |
| CCACGTCGCGCG | 0 | 2 |
| CCGCGCCGTGCT | 0 | 2 |
| CCTCGTCGCGCG | 0 | 2 |

|              |   |   |
|--------------|---|---|
| CCCCGTCGTGCA | 0 | 2 |
| CCGCGTAGAGCT | 0 | 2 |
| CCGAGACGGGCG | 0 | 2 |
| CCGCGACGAGCC | 0 | 2 |
| CCACGTCGAGCA | 0 | 2 |
| CCGAGGCGAGCA | 0 | 2 |
| CCGCGACGGGCT | 0 | 2 |
| CCACGTCGTGCC | 0 | 2 |
| CCCCGACGAGCA | 0 | 2 |
| CCACGCCGTGCA | 0 | 2 |
| CCACGACGTGCC | 0 | 2 |
| CCGCGCAGGGCA | 0 | 2 |
| CCAAGGCGTGCA | 0 | 2 |
| CCGCGAAGAGCC | 0 | 2 |
| CCACGGCGCGCG | 0 | 2 |
| CCTCGTAGGGCA | 0 | 2 |
| CCGCGCAGAGCT | 0 | 2 |
| CCCCGTAGGGCA | 0 | 2 |
| CCTAGGCGGGCG | 0 | 2 |
| CCAAGGCGAGCA | 0 | 2 |
| CCCAGACGTGCT | 0 | 2 |
| CCACGCCGAGCT | 0 | 2 |
| CCACGGCGAGCT | 0 | 2 |
| CCCCGTCGCGCC | 0 | 2 |
| CCGAGACGGGCC | 0 | 2 |
| CCTCGTAGAGCC | 0 | 2 |
| CCCCGTAGGGCC | 0 | 2 |
| CCCCGTAGAGCC | 0 | 2 |
| CCACGACGCGCC | 0 | 2 |
| CCTCGACGCGCC | 0 | 2 |
| CCACGACGGGCC | 0 | 2 |
| CCACGGCGAGCC | 0 | 2 |
| CCTAGACGGGCA | 0 | 2 |
| CCCAGGCGAGCC | 0 | 2 |
| CCAAGGAGGGCT | 0 | 2 |
| CCTAGAAGGGCT | 0 | 2 |
| CCACGGCGCGCC | 0 | 2 |
| CCGCGGCGGGCT | 1 | 2 |
| CCACGCCGAGCC | 1 | 2 |
| CCTCGACGGGCC | 1 | 2 |
| CCCCGGCGAGCC | 2 | 2 |
| CCTAGAAGAGCA | 2 | 2 |
| CCTCGCCGAGCA | 3 | 2 |
| CCTAGGAGGGCC | 3 | 2 |
| CCAAGGCGAGCC | 4 | 2 |
| CCTCGACGGGCT | 5 | 2 |
| CCTCGCCGCGCC | 5 | 2 |
| CCGCGTCGTGCT | 0 | 1 |
| CCGCGTAGGGCG | 0 | 1 |
| CCGAGACGTGCG | 0 | 1 |
| CCGCGTCGAGCA | 0 | 1 |
| CCGCGGCGAGCG | 0 | 1 |
| CCGCGAAGGGCG | 0 | 1 |

|              |   |   |
|--------------|---|---|
| CCCCGACGTGCG | 0 | 1 |
| CCGAGGCGTGCA | 0 | 1 |
| CCTCGGCGTGCG | 0 | 1 |
| CCGAGGCGTGCT | 0 | 1 |
| CCCCGTCGCGCG | 0 | 1 |
| CCAAGACGTGCG | 0 | 1 |
| CCGAGACGTGCT | 0 | 1 |
| CCTAGGCGTGCG | 0 | 1 |
| CCGAGGAGAGCG | 0 | 1 |
| CCCCGTCGGGCG | 0 | 1 |
| CCTCGTCGAGCA | 0 | 1 |
| CCCCGTAGGGCG | 0 | 1 |
| CCCAGACGTGCG | 0 | 1 |
| CCCCGTAGAGCG | 0 | 1 |
| CCACGCCGAGCG | 0 | 1 |
| CCGCGAAGAGCA | 0 | 1 |
| CCCCGTCGAGCA | 0 | 1 |
| CCCCGACGTGCA | 0 | 1 |
| CCGCGTCGCGCC | 0 | 1 |
| CCGCGGCGAGCT | 0 | 1 |
| CCCCGACGCGCG | 0 | 1 |
| CCCCGCCGAGCG | 0 | 1 |
| CCCCGTCGAGCT | 0 | 1 |
| CCCCGACGTGCT | 0 | 1 |
| CCTCGACGAGCA | 0 | 1 |
| CCCAGGCGAGCG | 0 | 1 |
| CCTCGACGAGCT | 0 | 1 |
| CCACGTCGAGCC | 0 | 1 |
| CCGAGACGAGCC | 0 | 1 |
| CCGAGGCGCGCT | 0 | 1 |
| CCCCGTCGGGCA | 0 | 1 |
| CCAAGGCGTGCT | 0 | 1 |
| CCCAGGCGTGCA | 0 | 1 |
| CCGCGGAGGGCT | 0 | 1 |
| CCACGGAGAGCG | 0 | 1 |
| CCTAGACGTGCT | 0 | 1 |
| CCAAGAAGGGCG | 0 | 1 |
| CCTCGACGAGCC | 0 | 1 |
| CCTAGGAGGGCG | 0 | 1 |
| CCACGGCGAGCA | 0 | 1 |
| CCACGACGGGCA | 0 | 1 |
| CCTAGAAGGGCG | 0 | 1 |
| CCTCGACGGGCA | 0 | 1 |
| CCCCGACGAGCC | 0 | 1 |
| CCCAGAAGGGCG | 0 | 1 |
| CCTAGGCGAGCT | 0 | 1 |
| CCGAGACGCGCC | 0 | 1 |
| CCACGCAGAGCT | 0 | 1 |
| CCTAGGCGCGCT | 0 | 1 |
| CCCAGACGAGCC | 0 | 1 |
| CCAAGGCGCGCC | 0 | 1 |
| CCAAGACGCGCC | 0 | 1 |
| CCTAGAAGGGCC | 0 | 1 |

|              |   |   |
|--------------|---|---|
| CCACGACGGGCG | 1 | 1 |
| CCTAGAAGAGCG | 1 | 1 |
| CCTCGGCGAGCA | 1 | 1 |
| CCTAGGCGAGCC | 1 | 1 |
| CCGCGCCGAGCG | 2 | 1 |
| CCACGACGTGCT | 2 | 1 |
| CCTCGCCGTGCT | 3 | 1 |
| CCGCGACGTGCC | 1 | 0 |
| CCGCGACGGGCA | 1 | 0 |
| CCCAGACGAGCG | 1 | 0 |
| CCCCGTCGTGCC | 1 | 0 |
| CCACGCCGCGCG | 1 | 0 |
| CCAAGACGTGCC | 1 | 0 |
| CCTAGGAGGGCT | 1 | 0 |
| CCCAGACGTGCC | 2 | 0 |
| CCAAGACGAGCC | 2 | 0 |

**Table S3. Peptide identification highlighted on sequence coverage maps for different S protein products.** Analysis by liquid chromatography-tandem mass spectrometry of peptides from in-gel trypsinization. A, Codon-optimized S protein (full size); B, QC24 (S2 fragment); C, QC11 (S2 fragment); D, QC24 full S protein; E, QC11 full S protein; and F, QC22 full S protein.

A. Codon-optimized S protein (full size)

| Accession  | Description                                                                                                   | False Discovery Rate |
|------------|---------------------------------------------------------------------------------------------------------------|----------------------|
| A0A087WVQ6 | Clathrin heavy chain OS=Homo sapiens OX=9606 GN=CLTC PE=1 SV=1                                                | 0                    |
| Q86UP2     | Kinectin OS=Homo sapiens OX=9606 GN=KTN1 PE=1 SV=1                                                            | 0                    |
| Q9NYU2     | UDP-glucose:glycoprotein glucosyltransferase 1 OS=Homo sapiens OX=9606 GN=UGGT1 PE=1 SV=3                     | 0                    |
| Q15075     | Early endosome antigen 1 OS=Homo sapiens OX=9606 GN=EEA1 PE=1 SV=2                                            | 0                    |
| P0DTC2     | Spike glycoprotein (Full Length) OS=Severe acute respiratory syndrome coronavirus 2 OX=2697049 GN=S PE=1 SV=1 | 0                    |
| P07814     | Bifunctional glutamate/proline--tRNA ligase OS=Homo sapiens OX=9606 GN=EPRS PE=1 SV=5                         | 0                    |
| Q14152     | Eukaryotic translation initiation factor 3 subunit A OS=Homo sapiens OX=9606 GN=EIF3A PE=1 SV=1               | 0                    |
| Q13576     | Ras GTPase-activating-like protein IQGAP2 OS=Homo sapiens OX=9606 GN=IQGAP2 PE=1 SV=4                         | 0                    |
| Q9NTJ3     | Structural maintenance of chromosomes protein 4 OS=Homo sapiens OX=9606 GN=SMC4 PE=1 SV=2                     | 0                    |

MFVFLVLLPLVSSQCVNLTRTQLPPAYTNSFTRGVYYPDKVFRSSVLHSTQDLFLPFFSNVTWFHAIHVSGTNGTKRFD  
NPVLPFNDGVYFASTEKSNIIRGWIFGTTLDSKTQSLIVNNATNVVIKVFCEFCNDPFLGVYHKNNKSWMESEFRVY  
SSANNCTFEYVSQPFLMDLEGKQGNFKNLREFVFKNIDGYFKIYSKHTPINLVRDLPGGFSALEPLVDLPIGINITRFQT  
LLALHRSYLTPGDSSSGWTAGAAAYVGYLQPRTFLLKYNENGTITDAVDCALDPLSETKCTLSFTVEKGIYQTSNFRV  
OPTESIVRFPNITNLCPFGEVFNATRFASVYAWNRKRISNCVADYSVLVNSASFSTFKCYGVSPTKLNDLCFTNVYADSF  
VIRGDEVROIAPGQTGKIADYNYKLPDDFTGCVIAWNSNNLDSKVGGNYYNYLYRLFRKSNLKPFERDISTEIYQAGSTPC  
NGVEGFNCYFPLQSYGFQPTNGVGYQPYRVVLSFELLHAPATVCGPKKSTNLVKNKCVNFNFNGLTGTGVLTESNKKFL  
PFQQFGRDIADTTDAVRDPQTLILDITPCSFGGVSVITPGTNTSNQVAVLYQDVNCTEVPVAIHADQLTPTWRVYSTGS  
NVFQTRAGCLIGAHEVNNSECDIPIGAGICASYQTQTNSPRRARSVASQSIAYTMSLGAENSVAYSNNNSIAIPTNFTI  
SVTTEILPVSMTKTSVDCTMYICGDSTECNLLLQYGSFCTQLNRLALTGIAVEQDKNTQEVFAQVKQIYKTPPIKDFGGF  
NFSQILPDPSKPSKRSFIEDLLFNKVTADAGFIKQYGDCLGDIARLDLCAQKFNGLTVLPPLTDEMIAQYTSALLAG  
TITSGWTFGAGAALQIPFAMQMAYRFENGIGVTQNVLYENQKLIANQFNSAIGKIQDSLSTASALGKLQDVVNQNAQALN  
TLVKQLSSNFGAISSVLNDILSRLDKVEAEVQIDRLITGRLOSLQTYVTQQLIRAAEIRASANLAATKMSECVLGQSKRV  
DFCGKGYHLMSFPQSAPHGVVFLHVTYVPAQEKNFTTAPAICHGDKAHFPREGVFVSNGTHWFVTQRNFYEPQIITDNT  
FVSGNCDVVIGIVNNTVYDPLQPELDSFKEELDKYFKNHTSPDVLGDISGINASVVNIQKEIDRLNEVAKNLNESLIDL  
QELGKYEYIKWPWYIWLGFIAGLIAIVMVTIMLCMTSCCSCLKGCCSCGSCCKFDEDDSEPVLKGVKLHYT

413/1273\*100 =32% coverage



## B. QC24 (S2 fragment)

|                                                                                                                       |   |
|-----------------------------------------------------------------------------------------------------------------------|---|
| Prohibitin OS=Homo sapiens OX=9606 GN=PHB PE=1 SV=1                                                                   | 0 |
| Eukaryotic translation initiation factor 3 subunit B OS=Homo sapiens OX=9606 GN=EIF3B PE=1 SV=3                       | 0 |
| Bifunctional glutamate/proline--tRNA ligase OS=Homo sapiens OX=9606 GN=EPRS PE=1 SV=5                                 | 0 |
| RNA-binding protein 26 OS=Homo sapiens OX=9606 GN=RBM26 PE=1 SV=3                                                     | 0 |
| Drebrin OS=Homo sapiens OX=9606 GN=DBN1 PE=1 SV=4                                                                     | 0 |
| Interleukin enhancer-binding factor 2 OS=Homo sapiens OX=9606 GN=ILF2 PE=1 SV=1                                       | 0 |
| Spike glycoprotein (C-terminal Fragment) OS=Severe acute respiratory syndrome coronavirus 2 OX=2697049 GN=S PE=1 SV=1 | 0 |

MFVFLVLLPLVSSQCVNLTRTQLPPAYTNSFTRGVVYPDKVFRSSVLHSTQDLFLPFFSNVTWFFHAIHVSGTNGTKRFD  
 NPVLPFNDGVYFASTEKSNIIRGWIFGTTLDSTQSLIVNNATNVVIKVCEFCNDPFLGVVYHKNNKSWMESEFRVY  
 SSANNCTFEYVSQPFLMDLEGKQGNFKNLREFVKFNIDGYFKIYKHTPINLVRDLPQGFSALEPLVDLPIGINITRFQT  
 LLALHRSYLTPGDSSSGWTAGAAAYVGYLQPRTFLLKYNENGTITDAVDCALDPLSEKCTLKSTVEKGIYQTSNFRV  
 QPTESIVRFPNITNLCPFGEVFNATRFASVYAWNRKRISNCVADYSVLYNSASFSTFKCYGVSPKLNLDLCFTNVYADSF  
 VIRGDEVQRQIAPGQTGKIADYNYKLPDDFTGCVIAWNSNNLDSKVGGNVNYLYRLFRKSNLKPFERDISTEIQAGSTPC  
 NGVEGFNCYFPLQSYGFQPTNGVGYQPYRVVLSFELLHAPATVCGPKKSTNLVKNKCVNFNFNGLTGTGVLTESNKKFL  
 PFQQFGRDIADTTDAVRDPQTLEILDITPCSFGGVSVITPGTNTSNQVAVLYQDVNCTEVPVAIHADQLTPTWRVYSTGS  
 NVFQTRAGCLIGAEHVNNSYECDIPIGAGICASYQTQTNSPRRARSVASQSIIAYTMSLGAENSVAYSNNNSIAIPTNFTI  
 SVTTEILPVSMTKTSVDCTMYICGDSTECNLLLQYGSFCTQLNRALTGIAVEQDKNTQEVFAQVKQIYKTPPIKDFGGF  
 NFSQILPDPSKPSKRSFIEDLLFNK**VTLADAGFIK**QYGDCLGDIAARDLICAQKFNGLTVLPPLTDEMIAQYTSALLAG  
 TITSGWTFGAGAALQIPFAMQMAYRFNGIGVTQNVLYENQKLIANQFNSAIGK**QDSLSSTASALGK****LQDVVNQNAQALN**  
**TLVK**QLSSNFGAISSVLNDILSRDKVEAEVQIDRLITGR**LQSLQTYVTQQLIR**AAEIRASANLAATK**MSECVLGQSKRV**  
 DFCGKGYHLMSFPQSPHGVVFLHVTYVPAQEKNFTTAPAICHGKAHFPREGVFSNGTHWVFTQRNFYEPQIITDNT  
 FVSGNCDVVIGIVNNTVYDPLQPELDSFKEELDKYFKNHTSPDVLGDISGINASVVNIQKEIDRLNEVAKNLNESLIDL  
 QELGKYEQYIKWPWYIWLGFIAGLIAIVMTIMLCMTSCCCLKGCCSCGSCCKFDEDDSEPVKGVKLHYT

## C. QC11 (S2 fragment)

|            |                                                                                                                                     |   |
|------------|-------------------------------------------------------------------------------------------------------------------------------------|---|
| Q16643     | Drebrin OS=Homo sapiens OX=9606 GN=DBN1 PE=1 SV=4                                                                                   | 0 |
| P25205     | DNA replication licensing factor MCM3 OS=Homo sapiens OX=9606 GN=MCM3 PE=1 SV=3                                                     | 0 |
| E9PLK3     | Aminopeptidase OS=Homo sapiens OX=9606 GN=NPEPPS PE=1 SV=1                                                                          | 0 |
| P35221     | Catenin alpha-1 OS=Homo sapiens OX=9606 GN=CTNNA1 PE=1 SV=1                                                                         | 0 |
| A0A0A0MT26 | Sodium/potassium-transporting ATPase subunit alpha-3 OS=Homo sapiens OX=9606 GN=ATP1A3 PE=1 SV=1                                    | 0 |
| P0DTC2     | Spike glycoprotein (Predominantly C-terminal Fragment) OS=Severe acute respiratory syndrome coronavirus 2 OX=2697049 GN=S PE=1 SV=1 | 0 |

MFVFLVLLPLVSSQCVNLTRTQLPPAYTNSFTRGVYYPDKVFRSSVLHSTQDLFLPFFSNVTWFHAIHVS GTNGTKRFD  
 NPVLPFNDGVYFASTEKSNIIIRGWIFGTTLDSTQSLIIVNNATNVVIKVCEFQFCNDPFLGVYYHKNNKSWMESEFRVY  
 SSANNCTFEYVSQPFLMDLEGKQGNFKNLREFVFNKIDGYFKIYSKHTPINLVRDLPQGFSALEPLVDLPIGINITRFQT  
 LLALHRSYLTPGDSSSGWTAGAAAYVGYLQPRTFLLKYNENGTITDAVDCALDPLSETKCTLKSFTVEKGIYQTSNFRV  
 QPTESIVRFPNITNLCPFGEVFNATRFASVYAWNRKRISNCVADYSVLNSASFSTFKCYGVSPTKLNDLCFTNVYADSF  
 VIRGDEVQRQIAPGQTGKIADYNYKLPDDFTGCVIAWNSNNLDSKVGGNYNYLYRLFRKSNLKPFERDISTEIIYQAGSTPC  
 NGVEGFNCYFPLQSYGFQPTNGVGYPYRVVLSFELHAPATVCGPKKSTNLVKNKCVNFNFNGLTGTGVLTESNKKFL  
 PFQQFGRDIADTTDAVRDPQTEILDITPCSFGGVSVITPGTNTSNQVAVLYQDVNCTEVPVAIHADQLTPTWRVYSTGS  
 NVFQTRAGCLIGAHEVNNSYECDIPIGAGICASYQTQTNSPRRARSVASQSI IAYTMSLGAENSVAYSNNNSIAIPTNFTI  
 SVTTEILPVSMTKTSVDCTMYICGDSTECNLLQYGSFCTQLNRALTGIAVEQDKNTQEVFAQVKQIYKTPPIKDFGGF  
 NFSQILPDPSKPSKR SFIEDLLFNKVTLADAGFIKQYGDCLGDIAARDLICAQKFNGLTVLPPLLTDemiaQYTSALLAG  
 TITSGWTFGAGAALQIPFAMQMAYRFNGIGVTQNVLYENQKLIANQFNSAIGKIQDSLSTASALGKLQDVVNQNAQALN  
 TLVKQLSSNFGAIISSVLNDILSRLDKVEAEVQIDRLITGRLLQSLQTYVTQQLIRAAEIRASANLAATKMSECVLGQSKRV  
 DFCGKGyHLMsFPQSAPHGVVFLHVTYVPAQEKNTTAPAI CHDGKAHFREGVFVSNGTHWFVTQRNFYEPQIIITDNT  
 FVSGNCDVVIGIVNNTVYDPLQPELDSFKEELDKYFKNHTSPDVLGDISGINASVVNIQKEIDRLNEVAKNLNESLIDL  
 QELGKYEQYIKWPWYIWLGFIAGLIAIVMVTIMLCCMTSCCCLKGCCSCGSCCKFDEDDSEPVLKGVKLHYT

## D. QC24 full S protein

|        |                                                                                                               |   |
|--------|---------------------------------------------------------------------------------------------------------------|---|
| P07814 | Bifunctional glutamate/proline--tRNA ligase OS=Homo sapiens OX=9606 GN=EPRS PE=1 SV=5                         | 0 |
| P39060 | Collagen alpha-1(XVIII) chain OS=Homo sapiens OX=9606 GN=COL18A1 PE=1 SV=5                                    | 0 |
| P13645 | Keratin, type I cytoskeletal 10 OS=Homo sapiens OX=9606 GN=KRT10 PE=1 SV=6                                    | 0 |
| O60841 | Eukaryotic translation initiation factor 5B OS=Homo sapiens OX=9606 GN=EIF5B PE=1 SV=4                        | 0 |
| Q9NTJ3 | Structural maintenance of chromosomes protein 4 OS=Homo sapiens OX=9606 GN=SMC4 PE=1 SV=2                     | 0 |
| P0DTC2 | Spike glycoprotein (Full Length) OS=Severe acute respiratory syndrome coronavirus 2 OX=2697049 GN=S PE=1 SV=1 | 0 |

MFVFLVLLPLVSSQCVNLTR**TQLPPAYTNSFTR**GVYYPDKVFRSSVLHSTQDLFLPFFSNVTWFWHAIHVSGTNGTKR**FD**  
**NPVLPFNDGVYFASTEK**SNIIR**GWIFGTTLDSK**TQSLIVNNATNVVIKVEFCNDPFLGVYYHKNNKSWMESEFRVY  
 SSANNCTFEYVSQPFLMDLEGKQGNFKNLREFVFKNIDGYFKIYS**HTPINLVR**DLPQGFSALEPLVDLPIGINITR**FQT**  
**LLALHR**SYLTPGDSSSGWTAGAAAYVGYLQPRTFLLKYNENGTITDAVDCALDPLSETKCTLSFTVEK**GIYQTSNFRV**  
**QPTESIVR**FPNITNLCPFGEVFNATRFASVYAWNKRISNCVADYSVLVNSASFSTFK**CYGVSPTK**LNDLCFTNVYADSF  
 VIRGDEV**RQIAPGQTGKIADYNYK**LPDDFTGCVIAWNSNNLDSK**VGGNYNYLYR**LFRKSNLKPFERDISTEIYQAGSTPC  
 NGVEGFNCYFPLQSYGFQPTNGVGYPYR**VVLSFELLHAPATVCGPK**KSTNLVKNKCVNFNFNGLTGTGVLTESNKK**FL**  
**PFQQFGRDIADTTDAVR**DPQTEILDITPCSGGVSIVITPGTNTSNQVAVLYQDVNCTEVPVAIHADQLTPTWR**VYSTGS**  
**NVFQTR**AGCLIGAEHVNSYECDIPIGAGICASYQTQTNSPRRARSVASQSIIAYTMSLGAENSVAYSNNISAIPTNFTI  
 SVTTEILPVSMTKTSVDCTMYICGDSTECSNLLQYGSFCTQLNR**ALTGIAVEQDK****NTQEVFAQVK**QIYKTPPIKDFGGF  
 NFSQILPDPSKPSKR**SFIEDLLFNK****VTLADAGFIKQYGDCLGDIAAR**DLICAQKFNGLTVLPPLTDEMIAQYTSALLAG  
 TITSGWTFGAGAALQIPFAMQMAYR**FNGIGVTQNVLYENQK****LIANQFNSAIGKIQDSLSSTASALGKLQDVVNQNAQALN**  
**TLVKQLSSNFGAISSVLNDILSR**LDKVEAEVQIDRLITGR**LQSLQTYVTQQLIR**AAEIR**ASANLAATKMSECVLGQSKRV**  
 DFCGKGYHLMSFPQSAPHGVVFLHVTYVPAQEKNFTTAPAICHGKAHFPREGVFSNGTHWVFTQRNFYEPQIITDNT  
 FVSGNCDVVIGIVNNTVYDPLQPELDSFKEELDKYFKNHTSPDVLGDISGINASVVNIQKEIDRLNEVAK**NLNESLIDL**  
**QELGK**YEQYIKWPWYIWLGFIAGLIAIVMVTIMLCMTSCCCLKGCCSCGSCCK**FDEDDSEPVLK**GVKLHYT

28% coverage

## E. QC11 full S protein

|            |                                                                                                 |
|------------|-------------------------------------------------------------------------------------------------|
| A0A087WVQ6 | Clathrin heavy chain OS=Homo sapiens OX=9606 GN=CLTC PE=1 SV=1                                  |
| Q86UP2     | Kinectin OS=Homo sapiens OX=9606 GN=KTN1 PE=1 SV=1                                              |
| Q15075     | Early endosome antigen 1 OS=Homo sapiens OX=9606 GN=EEA1 PE=1 SV=2                              |
| Q9NYU2     | UDP-glucose:glycoprotein glucosyltransferase 1 OS=Homo sapiens OX=9606 GN=UGGT1 PE=1 SV=3       |
| PODTC2     | Spike glycoprotein OS=Severe acute respiratory syndrome coronavirus 2 OX=2697049 GN=S PE=1 SV=1 |

MFVFLVLLPLVSSQCVNLTRTQLPPAYTNSFTRGVYYPDKVFRSSVLHSTQDLFLPFFSNVTWFHAIHVS GTNGTKRFD  
 NPVLPFNDGVYFASTEKSNIIRGWIFGTTLDSKTQSLIVNNATNVVIKVCEFCFNDPFLGVVYHKNNKSWMESEFRVY  
 SSANNCTFEYVSQPFLMDLEGKQGNFKNLREFVFNIDGYFKIYSKHTPINLVRDL PQGFSALEPLVDLPIGINITRFQT  
 LLALHRSYLT PGDSSSGWTAGAAAYYVGYLQPRTFLLKY NENG TITDAVDCALDPLSETKCTLSFTVEKGIYQTSNFRV  
 QPTESIVRFPNITNLCPFGEVFNATRFASVYAWNRRKRSNCVADYSVLYNSASFSTFKCYGVSPTKLN DL CFTNVYADSF  
 VIRGDEVROIAPGQTGKIADYNYKLPDDFTGCVIAWNSNNLDSKVG GNYNYLYRLFRKSNLKPFERDISTEIYQAGSTPC  
 NGVEGFNCYFP LQSYGFQPTNGVGYQPYRWWLSFELLHAPATVCGPKKSTNLVKNKCVNFNFNGLTGTGVLTESNKKFL  
 PFQQFGRDIADTTDAVRDPQ TLEILDITPCSFGGVSVITPGTNTSNQVAVLYQDVNCTEVPVAIHADQLTPTWRVYSTGS  
 NVFQTRAGCLIGA EHVNNSEYCDIPIGAGICASYQTQTNSPRRARSVASQSIIAYTMSLGAENSVAYSNN SIAIPTNFTI  
 SVTTEILPVSMTKTSVDCTMYICGDSTEC SNLLQYGSFCTQLNRALTGIAVEQDKNTQEVFAQVKQIYKTPPIKDFGGF  
 NFSQILPDPSKPSKRSFIEDLLFNKVT LADAGFIKQYGDCLGDIAARDLICAQKFNGLTVLPPLL TDEMIAQYTSALLAG  
 TITSGWTFGAGAALQIPFAMQMAYRFNGIGVTQNVLYENQKLIANQFNSAIGKIQDSLSTASALGKLQDVVNQNAQALN  
 TLVKQLSSNFGAISSVLNDILSR LDKVEAEVQIDRLITGR LQSLQTYVTQQLIRAAEIRASANLAATKMSECVLGQSKRV  
 DFCGKGYHLMSFPQSAPHGVVFLHVTYVPAQEKNFTTAPAICH DGKAHFPREGV FVSNGTHW FVTQRNFYEPQIITDNT  
 FVSGNCDVIGIVNNTVYDPLQPELDSFKEELDKYFKNHTSPD VDLGDISGINASV VNIQKEIDRLNEVAKNLNESLIDL  
 QELGKYEQYIKWPWYIWLGFIAGLIAIVMTIMLCCMTSCC SCLGCCSCGSCCKFDEDDSEPV LKGVKLHYT

463/1273\*100=36% coverage

## F. QC22 full S protein

|        |                                                                                                 |
|--------|-------------------------------------------------------------------------------------------------|
| Q14152 | Eukaryotic translation initiation factor 3 subunit A OS=Homo sapiens OX=9606 GN=EIF3A PE=1 SV=1 |
| Q9NTJ3 | Structural maintenance of chromosomes protein 4 OS=Homo sapiens OX=9606 GN=SMC4 PE=1 SV=2       |
| O60841 | Eukaryotic translation initiation factor 5B OS=Homo sapiens OX=9606 GN=EIF5B PE=1 SV=4          |
| P39060 | Collagen alpha-1(XVIII) chain OS=Homo sapiens OX=9606 GN=COL18A1 PE=1 SV=5                      |
| Q6P2E9 | Enhancer of mRNA-decapping protein 4 OS=Homo sapiens OX=9606 GN=EDC4 PE=1 SV=1                  |
| P0DTC2 | Spike glycoprotein OS=Severe acute respiratory syndrome coronavirus 2 OX=2697049 GN=S PE=1 SV=1 |

MFVFLVLLPLVSSQCVNLTR**TQLPPAYTNSFTR**GVVYPDKVFRSSVLHSTQDLFLPFFSNVTWFHAIHVS GTNGTKR**FD**  
**NPVLPFNDGVYFASTEK**SNIIIR**GWIFGTTLDSK**TQSLIVNNATNVVIKVCE FQFCNDPFLGVVYHKNNK**SWMESEFR**VY  
 SSANNCTFEYVSQPFLMDLEGKQGNFKNLREFVFKNIDGYFKIYSK**HTPINLVR**DLPQGFSALEPLVDLPIGINITR**FQT**  
**LLALHR**SYLTPGDSSSGWTAGAAAYYVGYLQPRTFLLKYNENGITITDAVDCALDPLSETKCTLKSFTVEK**GIYQTSNFRV**  
**QPTESIVR**FPNITNLCPFGEVFNATRFASVYAWNRKR**SNCVADYSVLVNSASFSTFKCYGVSP**TKLNDLCFTNVYADSF  
 VIRGDEV RQIAPGQTGK**IADYNYKL**PDDFTGCVIAWNSNNLDSK**VGGNYNYLYR**LFRKSNLKPFERDISTEIYQAGSTPC  
 NGVEGFNCYFPLQSYGFQPTNGVGYPYRVVLSFELLHAPATVCGPKKSTNLVKNKCVNFNFNGLTGTGVLTESNKK**FL**  
**PFQQFGR**DIADTTDAVRDPQTL EILDITPCSGGVSVITPGTNTSNQVAVLYQDVNCTEVPVAIHADQLTPTWR**VYSTGS**  
**NVFQTR**AGCLIGAEHVNNSECDIPIGAGICASYQTQTNSPRRARSVASQSIAYTMSLGAENSVAYSNNISIAIPTNFTI  
 SVTTEILPVSMTKTSVDCTMYICGDSTEC SNLLLQYGSFCTQLNR**ALTGIAVEQDK****NTQEVFAQVK**QIYKTPPIKDFGGF  
 NFSQILPDPSKPSKRSFIEDLLFNK**VTLADAGFIK****QYGDCLGDIAAR**DLICAQKFNGLTVLPPLL TDEMIAQYTSALLAG  
 TITSGWTFGAGAAALQIPFAMQMAYR**FNGIGVTQNVLYENQK****LIANQFN**SAIGK**IQDSL**SSTASALGK**LQDVVNQNAQA**LN  
**TLVK**QLSSNFGAISSVLNDILSR**LDKVEAEVQIDR**LITGR**LQSLQTYVTQQLIR**AAEIR**ASANLAATK****MSECVLGQSK**RV  
 DFCGKGYHLMSFPQSAPHGVVFLHVTYVPAQEKNFTTAPAICH DGKAHFPREGVFVSNGTHW FVTQRNFYEPQIITTDNT  
 FVSGNCDVVIGIVNNTVYDPLQPELDSFKEELDKYFKNHTSPDVLGDISGINASV VNIQKEIDRLNEVAKNLNESLIDL  
 QELGKYEQYIKWPWYIWLGFIAGLIAVMVTIMLCCMTSCC SCLGCCSCGSCCK**FDEDDSEPV**LKGVKLHYT

331/1273\*100=26% coverage

**Table S4. Expression and infectivity of pseudovirions produced in different cells.** WPRE qPCR, LTR qPCR, p24 and %GFP positive Vero E6 infected cells with lentiviral pseudovirions containing S proteins produced in LV (lenti), Expi293 (expi) and HEK293T cells. The data are presented as means  $\pm$  S.D. of 3 measurements.

| qPCR WPRE particle/ $\mu$ l | LV       |                | Expi293  |                | HEK293T  |                |
|-----------------------------|----------|----------------|----------|----------------|----------|----------------|
| Spike original              | 3.24E+07 | $\pm$ 5.52E+06 | 1.02E+08 | $\pm$ 1.15E+07 | 7.43E+05 | $\pm$ 2.62E+05 |
| Spike codon opt.            | 5.31E+04 | $\pm$ 8.44E+03 | 7.13E+06 | $\pm$ 8.79E+05 | 1.61E+05 | $\pm$ 7.43E+05 |
| Spike QC11 codon opt.       | 8.67E+05 | $\pm$ 8.51E+04 | 4.48E+06 | $\pm$ 4.11E+05 | 1.09E+05 | $\pm$ 1.61E+05 |
| Spike QC22 codon opt.       | 3.56E+04 | $\pm$ 1.46E+04 | 1.81E+06 | $\pm$ 1.31E+04 | 6.76E+05 | $\pm$ 1.09E+05 |
| Spike QC24 codon opt.       | 1.44E+06 | $\pm$ 1.32E+05 | 5.02E+06 | $\pm$ 3.90E+05 | 1.88E+05 | $\pm$ 8.18E+04 |

| qPCR LTR particle/ $\mu$ l | LV       |                | Expi293  |                | HEK293T   |                |
|----------------------------|----------|----------------|----------|----------------|-----------|----------------|
| Spike original             | 2.02E+07 | $\pm$ 9.57E+05 | 3.85E+07 | $\pm$ 6.29E+06 | 3.165E+05 | $\pm$ 2.84E+03 |
| Spike codon opt.           | 4.51E+04 | $\pm$ 7.35E+03 | 4.74E+06 | $\pm$ 8.41E+05 | 4.538E+04 | $\pm$ 5.81E+02 |
| Spike QC11 codon opt.      | 7.74E+05 | $\pm$ 1.24E+04 | 1.51E+06 | $\pm$ 5.70E+04 | 1.118E+04 | $\pm$ 2.94E+02 |
| Spike QC22 codon opt.      | 1.27E+04 | $\pm$ 9.76E+02 | 9.41E+05 | $\pm$ 1.56E+04 | 9.441E+03 | $\pm$ 7.52E+02 |
| Spike QC24 codon opt.      | 1.41E+06 | $\pm$ 1.18E+05 | 4.29E+06 | $\pm$ 3.66E+05 | 3.39E+05  | $\pm$ 6.87E+04 |

| %GFP at 48h post-infection | LV    |              | Expi293 |            | HEK293T |            |
|----------------------------|-------|--------------|---------|------------|---------|------------|
| Spike original             | 95.21 | $\pm$ 0.28   | 58.69   | $\pm$ 1.2  | 34.36   | $\pm$ 2.8  |
| Spike codon opt.           | 0.01  | $\pm$ 0.0014 | 1.97    | $\pm$ 0.5  | 10.34   | $\pm$ 0.44 |
| Spike QC11 codon opt.      | 0.61  | $\pm$ 0.24   | 1.19    | $\pm$ 0.26 | 15.78   | $\pm$ 0.53 |
| Spike QC22 codon opt.      | 0.01  | $\pm$ 0.006  | 1.06    | $\pm$ 0.09 | 24.78   | $\pm$ 3    |
| Spike QC24 codon opt.      | 1.45  | $\pm$ 0.01   | 1.47    | $\pm$ 0.04 | 20.3    | $\pm$ 0.14 |

| p24 ng/ml             | LV    | Expi293 | HEK293T |
|-----------------------|-------|---------|---------|
| Spike original        | 16631 | 11262   | 4137    |
| Spike codon opt.      | 172   | 2202    | 2005    |
| Spike QC11 codon opt. | 257   | 1594    | 668     |
| Spike QC22 codon opt. | 50    | 700     | 1820    |
| Spike QC24 codon opt. | 237   | 2832    | 164     |
